# Supplementary material
Source: PubMed Central journal article supplement (PMC2822495)
Supplement: 00308.2009_1.pdf [file 00308.2009_1.pdf]

## Supplemental methods and data:

*Co-immunoprecipitation of untagged KCNE1 and the LQT5 mutants in CHO-K1 cells-* For co-immunoprecipitation experiments CHO-K1 cells were grown to ~70 % confluence in 100 mm dishes. Cells were then transiently transfected with the  $\alpha$ -subunit KCNQ1-GFP (10  $\mu$ g) and or the  $\beta$ -subunit KCNE1 or LQT5 mutants (10  $\mu$ g) using Lipofectamine (Invitrogen). 48 hours after transfection, the cells were washed once with ice-cold binding buffer (50 mM Tris-Base, pH 7.4) and scraped into 500  $\mu$ l of ice-cold binding buffer. 50  $\mu$ l of this cell suspension was then removed and combined with 25  $\mu$ l of reducing 3 x SDS-PAGE loading buffer (R-STB) to provide a total cell lysate sample. A further 500  $\mu$ l of ice-cold binding buffer was then added to the cell suspension. To the cell suspension, an equal volume of hypotonic buffer (10 mM Tris-base and 10 mM EDTA, pH 7.4) was added and the samples incubated on ice for ten minutes. After incubation, an equal volume of sucrose buffer (10 mM Tris-base and 500 mM Sucrose, pH 7.4) was then added to restore tonicity. The samples were then homogenised in a glass homogeniser (>60 strokes) and centrifuged at 600xg for 15 minutes at 4 °C to pellet the nuclear fraction. The supernatant was then decanted into ultracentrifuge tubes and centrifuged at 100,000xg for 1 hour at 4 °C to pellet the membranes. Membrane pellets were resuspended in 1 ml of IP-buffer (50 mM HEPES, 100 mM NaCl and 10 % Glycerol) containing 1 % NP-40 and protease inhibitors (Roche) on ice for 30 minutes with short bursts, 5 times for 5 seconds, of sonication if necessary. To pre-clear the membrane preparations 30  $\mu$ l of Protein G sepharose (Zymed) was added and the samples incubated for 2 hours at 4 °C with end-over-end rotation. After rotation, the samples were centrifuged at 376xg for 3 minutes to pellet the sepharose beads and the supernatant removed and transferred to a fresh tube. To the supernatants 2  $\mu$ g of  $\alpha$ -GFP mouse monoclonal antibody (Roche (11814460001)) was then added and the samples incubated overnight at 4 °C with end-over-end rotation. To precipitate the  $\alpha$ -GFP antibody, 20  $\mu$ l of Protein G sepharose was added and incubated for 2 hours at 4 °C with end-over-end

rotation. The beads were then harvested by centrifugation at 376xg for 3 minutes and the supernatant discarded. After centrifugation, the beads were washed once with 500 µl ice-cold IP-buffer containing 0.1 % NP-40 and three times with 500 µl ice-cold IP buffer containing no detergent. Once washed, the precipitated proteins were eluted from the beads by incubating with 35 µl R-STB for 30 minutes at 37 °C.

## Supplemental Figures:

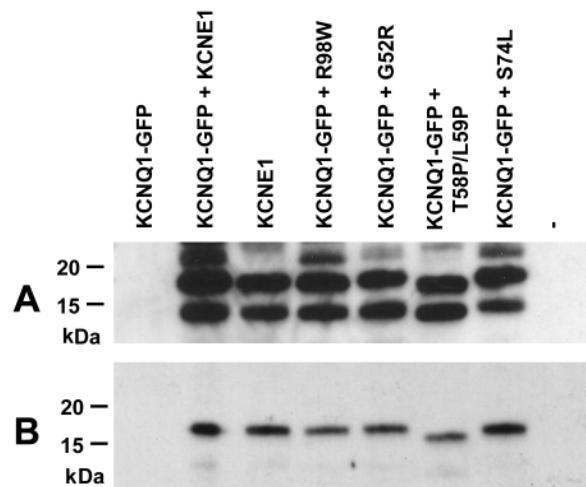

Fig. S1. 3XFlag tagging of KCNE1 and LQT5 mutants provides a more sensitive method for detection of KCNE1/LQT5 mutants than using a polyclonal antibody directed towards the C-terminus of KCNE1. In (A) and (B), CHO-K1 cells were transfected with 3XFlag-tagged KCNE1 or LQT5 mutants in the presence or absence of KCNQ1-GFP. 48 hours after transfection cells were lysed directly in 3 x R-STB. Equal amounts of each lysate was loaded onto two separate tricine gels. After separation, the proteins were transferred to stable membranes. The membranes were then probed with either; Panel (A):  $\alpha$ -FLAG (M2) (mouse monoclonal (Sigma) (F3165)) (1:2000) or Panel (B):  $\alpha$ -KCNE1 (rabbit polyclonal (Alomone) (APC-008) (1:500)) antibodies. The presence of bound primary antibody was then detected using either an anti-mouse-HRP conjugated antibody (Amersham) (1:3000) or an anti-rabbit-HRP conjugated antibody (Santa Cruz Biotechnology) (1:3000) and the blots were exposed for an equal length of time (2 minutes).

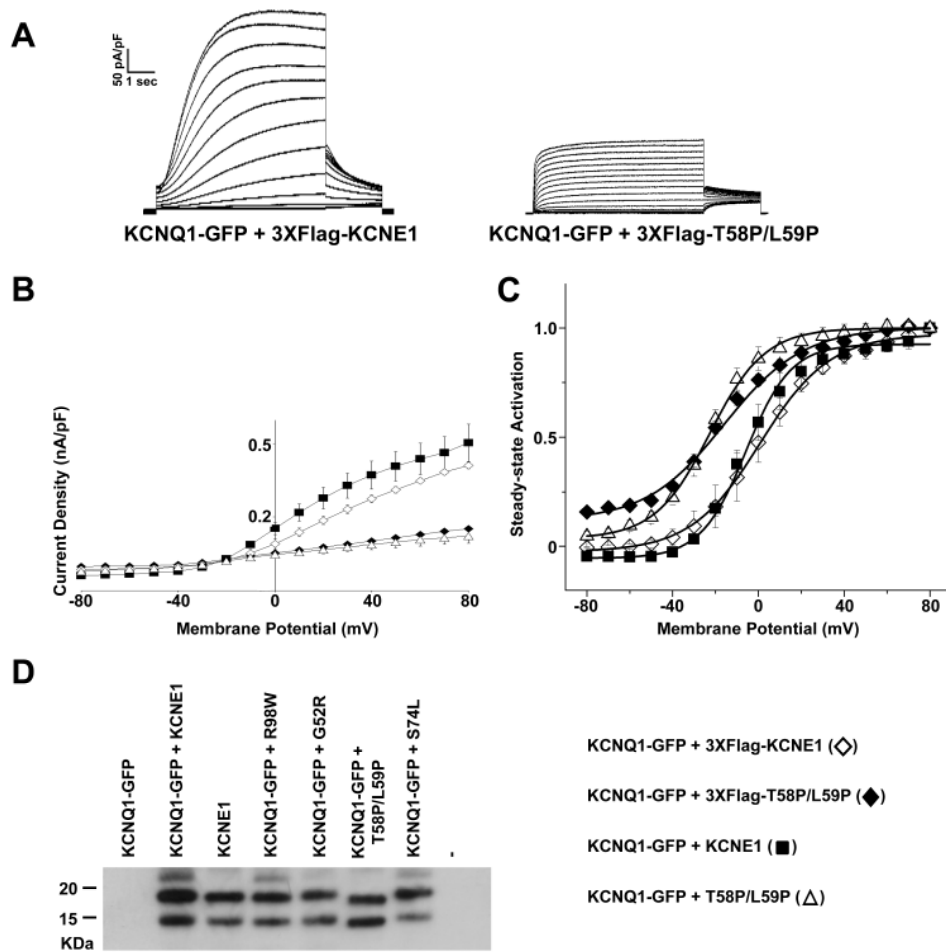

Fig. S2. Patch clamp and expression based characterisation of 3XFlag tagged KCNE1 and LQT5 mutants. (A) Representative traces of KCNQ1-GFP expressed in the presence of 3XFlag-KCNE1 or 3XFlag-T58P/L59P that are normalised to cell capacitance. (B) Analysis of the effects of 3XFlag tagging KCNE1 and T58P/L59P on maximal current density (normalised to cell capacitance (nA/pF)). (C) Normalised voltage-dependent activation curves of KCNQ1-GFP expressed with either 3XFlag-tagged or untagged KCNE1 and T58P/L59P. The activation curves are fitted with Boltzmann functions (solid lines) using non-linear regression. For KCNQ1-GFP + KCNE1,  $V_{0.5} = -5.83 \pm 1.77$  and slope factor =  $10.5 \pm 1.06$ . For KCNQ1-GFP + 3XFlag-KCNE1,  $V_{0.5} = 0.84 \pm 0.77$  and slope factor =  $16.2 \pm 0.74$ . For KCNQ1-GFP + T58P/L59P,  $V_{0.5} = -22.67 \pm 1.58$  and slope factor =  $12.88 \pm 1.39$ . For KCNQ1-GFP + 3X-Flag-T58P/L59P,  $V_{0.5} = -15.8 \pm 1.57$  and slope factor =  $18.3 \pm 1.18$ . Data are presented as mean  $\pm$  S.E.M. (for untagged samples  $n = 5$  cells, for Flag-tagged samples  $n = 3$  cells). (D) Representative western blot analysis of the expression of Flag-tagged KCNE1 and LQT5 mutants in CHO-K1 cells. The presence of FLAG tagged KCNE1 and LQT5 mutants was detected using a mouse monoclonal antibody (Sigma (F3165)) that recognises the FLAG epitope. - = blank transfection control.
